# Supplementary material
Source: PubMed Central journal article supplement (PMC4609654)
Supplement: 865d53aa51bdffa40cffbef4c059c502_C-00117-2015_Fig._2_at_proof.pdf [file 865d53aa51bdffa40cffbef4c059c502_C-00117-2015_Fig._2_at_proof.pdf]

| Name                                         | Class                         | Structure                                                                           | IC50                   | Target                                          | Clinical development  | Reference       |
|----------------------------------------------|-------------------------------|-------------------------------------------------------------------------------------|------------------------|-------------------------------------------------|-----------------------|-----------------|
| <b>Aspirin (NSAIDs)</b>                      | Generic                       |     | 29.3 μM                | β-catenin                                       | Clinical              | (3, 11, 29, 32) |
| <b>Celecoxib (NSAIDs)</b>                    | Generic                       |    | 25 μM                  | COX2                                            | FDA-approved (Pfizer) | (15, 24, 28)    |
| <b>Sulindac (NSAIDs)</b>                     | Generic                       |    | 1.8/<br>6.3 μM         | COX1, COX2                                      | FDA-approved          | (36)            |
| <b>Retinoids (Vitamins)</b>                  | Generic                       |    | -                      | β-catenin-TCF                                   | Clinical              | (31)            |
| <b>1α25,-dihydroxy-Vitamin D3 (Vitamins)</b> | Generic                       |    | 5.8 nM (COX-2)         | β-catenin-TCF                                   | Clinical              | (25)            |
| <b>Curcumin (Polyphenols)</b>                | Generic                       |    | 20 μM                  | Nonspecific antioxidant                         | -                     | (18)            |
| <b>EGCG (Polyphenols)</b>                    | Generic                       |    | 20 μg/ml               | Antioxidant                                     | -                     | (21,30)         |
| <b>Quercetin (Polyphenols)</b>               | Generic                       |    | 100 μM                 | Antioxidant                                     | -                     | (26)            |
| <b>Resveratrol (Polyphenols)</b>             | Generic                       |    | -                      | β-catenin-TCF, sirtuin activator, antioxidant   | -                     | (5,10)          |
| <b>IWP-1</b>                                 | Wnt-receptor complex          |    | 58 nM                  | Porcupine                                       | Preclinical           | (4)             |
| <b>IWP-2</b>                                 | Wnt-receptor complex          |    | 27 nM                  | Porcupine                                       | Preclinical           | (4)             |
| <b>LGK974</b>                                | Wnt-receptor complex          |   | 0.4 nM                 | Porcupine                                       | Phase-I               | (23)            |
| <b>OMP-18R5</b>                              | Wnt-receptor complex          | -                                                                                   | -                      | Anti-Frizzled antibody                          | Phase I               | (16)            |
| <b>F8CRDhFc</b>                              | Wnt-receptor complex          | -                                                                                   | 1-2 nM                 | Sequesters Wnts                                 |                       | (8)             |
| <b>OMP-54F28</b>                             | Wnt-receptor complex          | -                                                                                   | -                      | Sequesters Wnts                                 | Phase I               | (8)             |
| <b>WIF1-Fc and sFRP-Fc</b>                   | Wnt-receptor complex          | -                                                                                   | -                      | Wnt ligands                                     | -                     | (19)            |
| <b>Wnt-1 antibody</b>                        | Wnt-receptor complex          | -                                                                                   | -                      | Wnt-1                                           | -                     | (17, 27, 37)    |
| <b>Wnt-2 antibody</b>                        | Wnt-receptor complex          | -                                                                                   | -                      | Wnt-2                                           | -                     | (38, 39)        |
| <b>Wnt-10b antibody</b>                      | Wnt-receptor complex          | -                                                                                   | -                      | Wnt-10b                                         | -                     | (27)            |
| <b>3289-8625</b>                             | β-catenin-destruction complex |  | 12.5 μM                | Blocks PDZ domain of Dvl                        | Preclinical           | (14)            |
| <b>FJ9</b>                                   | β-catenin-destruction complex |  | >100 μM                | Interaction between FZD7 and DVL-PDZ domain     | Preclinical           | (12)            |
| <b>NSC668036</b>                             | β-catenin-destruction complex |  | -                      | Blocks PDZ domain of Dvl                        | Preclinical           | (6)             |
| <b>IWR-1</b>                                 | β-catenin-destruction complex |  | 0.18 μM                | Tankyrase 1,2                                   | Preclinical           | (4)             |
| <b>JW55</b>                                  | β-catenin-destruction complex |  | 7.3 μM                 | Tankyrase 1,2                                   | Preclinical           | (2, 35)         |
| <b>XAV939</b>                                | β-catenin-destruction complex |  | 11 nM/<br>4 nM         | Tankyrases1,2                                   | Preclinical           | (20)            |
| <b>PFK115-584</b>                            | β-catenin/ TCF transcription  |  | < 1μM                  | Inhibits association between Tcf4 and β-catenin | Preclinical           | (22)            |
| <b>CGP049090</b>                             | β-catenin/ TCF transcription  |  | < 1μM                  | Inhibits association between Tcf4 and β-catenin | Preclinical           | (22)            |
| <b>iCRT3</b>                                 | β-catenin/ TCF transcription  |  | 0.14 μM                | Tcf4 and β-catenin interaction                  | Preclinical           | (13)            |
| <b>iCRT5</b>                                 | β-catenin/ TCF transcription  |  | -                      | Tcf4 and β-catenin interaction                  | Preclinical           | (13)            |
| <b>iCRT14</b>                                | β-catenin/ TCF transcription  |  | -                      | Tcf4 and β-catenin interaction                  | Preclinical           | (13)            |
| <b>PNU-74654</b>                             | β-catenin/ TCF transcription  |  | -                      | Tcf4 and β-catenin interaction                  | Preclinical           | (34)            |
| <b>2,4-diaminoquinazoline series</b>         | β-catenin/ TCF transcription  |  | 0.22 μM (16K compound) | Tcf4 and β-catenin interaction                  | Preclinical           | (7)             |
| <b>BC21</b>                                  | β-catenin/ TCF transcription  |  | 5 μM                   | Tcf4 and β-catenin interaction                  | Preclinical           | (33)            |
| <b>ICG-001</b>                               | β-catenin/ TCF transcription  |  | 3 μM                   | β-catenin / CBP interaction                     | Preclinical           | (1, 9)          |
